# Supplementary material
Source: Springer Nature journal article supplement (https://www.springermedizin.de/resource/supplementary/12889_2013_6110_MOESM1_ESM.pdf/9494484)

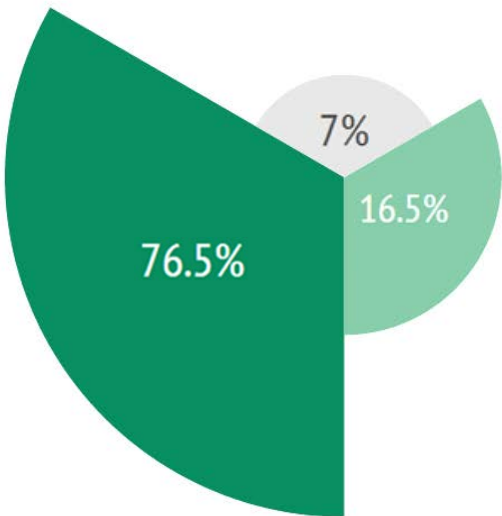

Never Tested

Tested <12mos

Tested >12mos

Supplement: MOESM1 [file 9494484]
